# Supplementary material for: Cross-national comparison of two general population job exposure matrices for physical work exposures
Source: PubMed Central journal article supplement — Occup Environ Med. 2019 Mar 20;76(8):567–72. doi: 10.1136/oemed-2018-105408 (PMC6703148; doi:10.1136/oemed-2018-105408), 2019-03-20
Supplement: oemed-2018-105408supp001.pdf [file oemed-2018-105408supp001.pdf]

Supplement Table 1. Exposure Variables in French (n = 367 PCS job codes) and American (n = 239 SOC job codes) Job Exposure Matrices.

| French JEM                | Description                                                                                                                       | Mean (SD) [Min-Max]     | American JEM                                  | Description                                                                                                                                                                                                       | Mean (SD) [Min-Max]   |
|---------------------------|-----------------------------------------------------------------------------------------------------------------------------------|-------------------------|-----------------------------------------------|-------------------------------------------------------------------------------------------------------------------------------------------------------------------------------------------------------------------|-----------------------|
| <i>Physical intensity</i> | How would you describe the intensity of the physical efforts of your work during a typical work day (6 - 20 scale)                | 10.9 (2.3) [6.8 - 15.3] | <i>Performing general physical activities</i> | Performing physical activities that require considerable use of your arms and legs and moving your whole body, such as climbing, lifting, balancing, walking, stooping, and handling of materials. (0 - 7 scale%) | 3.1 (1.3) [0.2 - 6.6] |
|                           |                                                                                                                                   |                         | <i>Dynamic strength</i>                       | The ability to exert muscle force repeatedly or continuously over time. This involves muscular endurance and resistance to muscle fatigue. (0 - 7 scale%)                                                         | 1.3 (1.0) [0 - 4.5]   |
|                           |                                                                                                                                   |                         | <i>Static strength</i>                        | The ability to exert maximum muscle force to lift, push, pull, or carry objects. (0 - 7 scale%)                                                                                                                   | 1.8 (1.3) [0 - 4.9]   |
|                           |                                                                                                                                   |                         | <i>Trunk strength</i>                         | The ability to use your abdominal and lower back muscles to support part of the body repeatedly or continuously over time without 'giving out' or fatiguing. (0 - 7 scale%)                                       | 2.1 (1.1) [0 - 4.8]   |
| <i>Stand</i>              | During a typical work day: Are you standing (1 - 4 scale*).                                                                       | 2.9 (0.8) [1.2 - 4.0]   | <i>Spend time standing</i>                    | How much does this job require standing? (1 - 5 scale#)                                                                                                                                                           | 3.3 (1.0) [1.5 - 5.0] |
|                           |                                                                                                                                   |                         | <i>Spend time walking and running</i>         | How much does this job require walking and running? (1 - 5 scale#)                                                                                                                                                | 2.7 (0.8) [1.0 - 4.7] |
| <i>Repetition</i>         | Do you repeat the same actions more than 2 to 4 times per minute (1 - 4 scale*)                                                   | 2.0 (0.6) [1.0 - 3.6]   | <i>Spend time making repetitive motions</i>   | How much does this job require making repetitive motions? (1 - 5 scale#)                                                                                                                                          | 3.1 (0.8) [1.4 - 4.8] |
|                           |                                                                                                                                   |                         | <i>Spend time using your hands</i>            | How much does this job require using your hands to handle, control, or feel objects, tools or controls? (1 - 5 scale#)                                                                                            | 3.4 (1.0) [1.3 - 5.0] |
|                           |                                                                                                                                   |                         | <i>Handling and moving objects</i>            | Using hands and arms in handling, installing, positioning, and moving materials, and manipulating things. (0 - 7 scale%)                                                                                          | 3.7 (1.5) [0.2 - 6.6] |
|                           |                                                                                                                                   |                         | <i>Wrist finger speed</i>                     | The ability to make fast, simple, repeated movements of the fingers, hands, and wrists. (0 - 7 scale%)                                                                                                            | 1.1 (0.9) [0 - 3.9]   |
| <i>Changes tasks</i>      | On a typical work day: Can you interrupt your work or change tasks or activities for 10 minutes or more each hour (1 - 4 scale*). | 2.9 (0.4) [1.5 - 3.8]   | -                                             | -                                                                                                                                                                                                                 | -                     |
| <i>Rest eyes</i>          | During a typical work day: Can you rest your eyes for a few seconds outside of work breaks (1 - 4 scale*).                        | 3.1 (0.48) [1.3 - 3.9]  | -                                             | -                                                                                                                                                                                                                 | -                     |

|                                                                 |                                                                                                                                                                     |                          |                                                                        |                                                                                                                                                                |                                                                      |
|-----------------------------------------------------------------|---------------------------------------------------------------------------------------------------------------------------------------------------------------------|--------------------------|------------------------------------------------------------------------|----------------------------------------------------------------------------------------------------------------------------------------------------------------|----------------------------------------------------------------------|
| <i>Kneel or squat</i>                                           | During a typical work day: Do you kneel or squat (1 - 4 scale*).                                                                                                    | 1.8 (0.6)<br>[1.0 - 3.5] | <i>Spend time kneeling<br/>crouching stooping or<br/>crawling</i>      | How much does this job require kneeling, crouching, stooping or crawling? (1 - 5 scale#)                                                                       | 1.9 (0.7)<br>[1.0 - 4.3]                                             |
| <i>Bend trunk</i>                                               | Do you lean forward or sideways regularly or for prolonged periods (1 - 4 scale*)                                                                                   | 1.9 (0.6)<br>[1.0 - 3.7] | <i>Spend time bending or<br/>twisting body</i>                         | How much does this job require bending or twisting your body? (1 - 5 scale#)                                                                                   | 2.46 (0.911)<br>1.06 - 4.67                                          |
|                                                                 |                                                                                                                                                                     |                          | <i>Cramped work space &amp;<br/>awkward positions</i>                  | How often does this job require working in cramped work spaces that requires getting into awkward positions? (1 - 5 scale#)                                    | 2.0 (0.8)<br>[1.0 - 4.3]                                             |
| <i>Drive machinery</i>                                          | Do you have to drive construction machinery, a tractor, a self-propelled forklift or other mobile machinery at your workplace (except car or truck) (1 - 4 scale*). | 1.3 (0.4)<br>[1.0 - 3.7] | <i>Operating vehicles<br/>mechanized devices or<br/>equipment</i>      | Running, maneuvering, navigating, or driving vehicles or mechanized equipment, such as forklifts, passenger vehicles, aircraft, or water craft. (0 - 7 scale%) | 1.8 (1.2)<br>[0 - 6.6]                                               |
| <i>Drive car or truck</i>                                       | Do you have to drive a vehicle (automobile, truck, bus, bus, ambulance, motorcycle, etc.) on public roads, excluding commuting (1 - 4 scale*).                      | 1.5 (0.6)<br>[1.0 - 4.0] | <i>Operating vehicles<br/>mechanized devices or<br/>equipment</i>      | Running, maneuvering, navigating, or driving vehicles or mechanized equipment, such as forklifts, passenger vehicles, aircraft, or water craft. (0 - 7 scale%) | 1.8 (1.2)<br>[0 - 6.6]                                               |
| <i>Handle object<br/>1-4 kg,<br/>&gt;4kg</i>                    | If yes, how much time do you spend doing the following tasks or activities:<br>Handling or regularly moving a load, a part, or an object:                           |                          | <i>Spend time using your hands<br/>(Only for handle object 1-4 kg)</i> |                                                                                                                                                                |                                                                      |
|                                                                 |                                                                                                                                                                     |                          | • Weighing between 1 and 4 kg (0 - 4 scale^)                           | 1.6 (1.1)<br>[0 - 3.9]                                                                                                                                         | <i>Dynamic strength<br/>(All Handle/Carry Variables)</i>             |
|                                                                 |                                                                                                                                                                     |                          | • Weighing more than 4 kg (0 - 4 scale^).                              | 1.3 (1.0)<br>[0 - 3.8]                                                                                                                                         | <i>Static strength<br/>(All Handle/Carry Variables)</i>              |
| <i>Carry loads<br/>&lt; 10 kg,<br/>10-25 kg,<br/>&gt; 25 kg</i> | If yes, how much time do you spend doing the following tasks or activities.<br>Carrying a load that:                                                                |                          | <i>Handling and moving objects<br/>(All Handle/Carry Variables)</i>    |                                                                                                                                                                |                                                                      |
|                                                                 |                                                                                                                                                                     |                          | • Weighs less than 10 kg (0 - 4 scale^).                               | 1.2 (0.9)<br>[0 - 3.5]                                                                                                                                         |                                                                      |
|                                                                 |                                                                                                                                                                     |                          | • Weighs 10 to 25 kg (0 - 4 scale^).                                   | 1.0 (0.8)<br>[0 - 3.3]                                                                                                                                         | <i>Trunk Strength<br/>(Only for Carry Loads 10-25 kg, &gt;25 kg)</i> |
|                                                                 | • Weighs more than 25 kg (0 - 4 scale^).                                                                                                                            | 0.8 (0.7)<br>[0 - 2.9]   |                                                                        |                                                                                                                                                                |                                                                      |

|                                |                                                                                                                                                                                          |                           |                                                   |                                                                                                                                                                                                             |                          |
|--------------------------------|------------------------------------------------------------------------------------------------------------------------------------------------------------------------------------------|---------------------------|---------------------------------------------------|-------------------------------------------------------------------------------------------------------------------------------------------------------------------------------------------------------------|--------------------------|
| <i>Use vibrating tools</i>     | On a typical work day, do you use: Vibrating tools or place your hand (s) on vibrating machines (1 - 4 scale*).                                                                          | 1.3 (0.5)<br>[1.0 - 2.9]  | <i>Exposed to whole body vibration</i>            | How often does this job require exposure to whole body vibration (e.g., operate a jackhammer)? (1 - 5 scale#)                                                                                               | 1.3 (0.6)<br>[1.0 - 4.2] |
| <i>Use computer screen</i>     | During a typical work day, do you use: A computer screen or control panel (1 - 4 scale*).                                                                                                | 2.8 (0.9)<br>[1.0 - 4.0]  | <i>Interacting with computers</i>                 | Using computers and computer systems (including hardware and software) to program, write software, set up functions, enter data, or process information. (0 - 7 scale%)                                     | 2.8 (1.1)<br>[0.1 - 6.1] |
| <i>Use keyboard or scanner</i> | During a typical work day, do you use: A keyboard, a mouse or similar device (optical pen, scanner) to enter data (1 - 4 scale*).                                                        | 2.7 (0.9)<br>[1.0 - 4.0]  | <i>Interacting with computers</i>                 | How important is repeating the same physical activities (e.g., key entry) or mental activities (e.g., checking entries in a ledger) over and over, without stopping, to performing this job? (1 - 5 scale*) | 3.2 (0.6)<br>[1.6 - 4.9] |
|                                |                                                                                                                                                                                          |                           | <i>Importance of repeating same tasks</i>         |                                                                                                                                                                                                             |                          |
| <i>Bend neck</i>               | How long do you spend in the following posture during a typical work day: Bending your head forward regularly or for a prolonged period (1 - 4 scale*).                                  | 2.5 (0.4)<br>[1.3 - 3.9]  | -                                                 | -                                                                                                                                                                                                           | -                        |
| <i>Arms above shoulder</i>     | How long do you spend in the following posture during a typical work day: Work with one or both arms in the air above the shoulders) regularly or for a prolonged period (1 - 4 scale*). | 1.5 (0.5)<br>[1.0 - 3.4]  | -                                                 | -                                                                                                                                                                                                           | -                        |
| <i>Reach behind</i>            | How long do you spend in the following posture during a typical work day: Reaching regularly for items behind your back (1 - 4 scale*).                                                  | 1.3 (0.2)<br>[1.0 - 2.2]  | <i>Cramped work space &amp; awkward positions</i> |                                                                                                                                                                                                             |                          |
|                                |                                                                                                                                                                                          |                           | <i>Spend time bending or twisting body</i>        |                                                                                                                                                                                                             |                          |
| <i>Arms abducted</i>           | How long do you spend in the following posture during a typical work day: Working with one or both arms separated away from the body regularly or for a prolonged period (1 - 4 scale*). | 1.6 (0.48)<br>[1.0 - 2.9] | -                                                 | -                                                                                                                                                                                                           | -                        |
| <i>Bend elbow</i>              | How long do you spend in the following posture during a typical work day: Flex the elbow repeatedly or keep the elbow flexed against resistance (1 - 4 scale*).                          | 1.7 (0.5)<br>[1.0 - 3.2]  | <i>Handling and moving objects</i>                |                                                                                                                                                                                                             |                          |
| <i>Rotate forearm</i>          | How long do you spend in the following posture during a typical work day: Twist your forearm as if you are using a screwdriver (1 - 4 scale*).                                           | 1.5 (0.6)<br>[1.0 - 3.4]  | <i>Spend time using your hands</i>                |                                                                                                                                                                                                             |                          |
| <i>Bend wrist</i>              |                                                                                                                                                                                          | 1.6 (0.5)                 | <i>Handling and moving objects</i>                |                                                                                                                                                                                                             |                          |
|                                |                                                                                                                                                                                          |                           | <i>Spend time using your hands</i>                |                                                                                                                                                                                                             |                          |

|                           |                                                                                                                                                                    | [1.0 - 3.1]              | <i>Handling and moving objects</i> |                                                                                                                                                               |                          |
|---------------------------|--------------------------------------------------------------------------------------------------------------------------------------------------------------------|--------------------------|------------------------------------|---------------------------------------------------------------------------------------------------------------------------------------------------------------|--------------------------|
|                           |                                                                                                                                                                    |                          | <i>Wrist finger speed</i>          |                                                                                                                                                               |                          |
|                           | How long do you spend in the following posture during a typical work day:<br>Bending the wrist (1 - 4 scale*).                                                     |                          |                                    |                                                                                                                                                               |                          |
| <i>Press base of hand</i> | How long do you spend in the following posture during a typical work day:<br>Press or tap with the base of the hand on a hard surface or on a tool (1 - 4 scale*). | 1.3 (0.4)<br>[1 - 2.7]   | -                                  | -                                                                                                                                                             | -                        |
| <i>Finger pinch</i>       | How long do you spend in the following posture during a typical work day: Pinch objects with your thumb and forefinger (1 - 4 scale*).                             | 1.6 (0.5)<br>[1.0 - 3.6] | <i>Finger dexterity</i>            | The ability to make precisely coordinated movements of the fingers of one or both hands to grasp, manipulate, or assemble very small objects. (0 - 7 scale%). | 2.6 (0.7)<br>[0.3 - 4.9] |
|                           |                                                                                                                                                                    |                          | <i>Manual Dexterity</i>            | The ability to quickly move your hand, your hand together with your arm, or your two hands to grasp, manipulate, or assemble objects.(0 - 7 scale%)           | 2.1 (1.2)<br>[0 - 4.6]   |
|                           |                                                                                                                                                                    |                          | <i>Wrist finger speed</i>          | The ability to make fast, simple, repeated movements of the fingers, hands, and wrists. (0 - 7 scale%)                                                        | 1.1 (0.9)<br>[0 - 3.9]   |
| <i>Work outdoors</i>      | Work Outdoors (1 - 4 scale*).                                                                                                                                      | 1.7 (0.7)<br>[1.0 - 4.0] | <i>Outdoors exposed to weather</i> | How often does this job require working outdoors, exposed to all weather conditions? (1 - 5 scale#)                                                           | 2.3 (1.2)<br>[1.0 - 5.0] |
|                           |                                                                                                                                                                    |                          | <i>Outdoors under cover</i>        | How often does this job require working outdoors, under cover (e.g., structure with roof but no walls)? (1 - 5 scale#)                                        | 1.8 (0.7)<br>[1.0 - 4.1] |

\* CONSTANCES – 4-point ordinal scale formatted with anchor points: 1 = Never or Nearly Never, 2 = Rarely (< 2 hrs per day), 3 = Often (2-4 hrs per day), 4 = Always or Nearly Always.

^ CONSTANCES – 5-point ordinal scale formatted with anchor points: 0 = No, 1 = Never or Nearly Never, 2 = Rarely (< 2 hrs per day), 3 = Often (2-4 hrs per day), 4 = Always or Nearly Always

% O\*NET – 8-point ordinal scale measuring the degree to which a particular descriptor is required or needed to perform the occupation. Example: *Performing General Physical Activities* 1 = Walk between workstations in small office, 4 = Paint outside of a house, 6 = Climb up and down poles to install electricity. *Dynamic Strength* 2 = Using pruning shears to trim a bush, 5 = Climb a 48-foot long ladder, 6 = Perform a gymnastics routine using the rings.

# O\*NET – 5-point ordinal scale measuring how often a particular descriptor is required to be performed in an occupation. 1 = Never, 2 = Once a year, 3 = Once a month, 4 = Once a week, 5 = Every day

\*^ O\*NET – 5-point ordinal scale measuring the importance of performing a particular descriptor over and over, without stopping. 1 = Not important at all, 2 = Fairly important, 3 = Important, 4 = Very important, 5 = Extremely important

|                         | American O*NET JEM Exposure Variables  |                  |                 |                |                     |                                |                                      |                             |                             |                    |                                                    |                                         |                                        |                                                    |                                 |                            |                                    |                  |                  |                             |                      |
|-------------------------|----------------------------------------|------------------|-----------------|----------------|---------------------|--------------------------------|--------------------------------------|-----------------------------|-----------------------------|--------------------|----------------------------------------------------|-----------------------------------------|----------------------------------------|----------------------------------------------------|---------------------------------|----------------------------|------------------------------------|------------------|------------------|-----------------------------|----------------------|
|                         | Performing General Physical Activities | Dynamic Strength | Static Strength | Trunk Strength | Spend Time Standing | Spend Time Walking and Running | Spend Time Making Repetitive Motions | Spend Time Using Your Hands | Handling and Moving Objects | Wrist Finger Speed | Spend Time Kneeling Crouching Stooping or Crawling | Spend Time Bending or Twisting the Body | Cramped Work Space & Awkward Positions | Operating Vehicles Mechanized Devices or Equipment | Exposed to Whole Body Vibration | Interacting With Computers | Importance of Repeating Same Tasks | Finger Dexterity | Manual Dexterity | Outdoors Exposed to Weather | Outdoors Under Cover |
| Physical intensity      | <b>0.74</b>                            | <b>0.81</b>      | <b>0.82</b>     | <b>0.83</b>    | 0.70                | 0.68                           | 0.44                                 | 0.65                        | 0.76                        | 0.55               | 0.72                                               | 0.79                                    | 0.59                                   | 0.54                                               | 0.42                            | -0.71                      | -0.24                              | 0.48             | 0.72             | 0.35                        | 0.25                 |
| Stand                   | 0.63                                   | 0.68             | 0.68            | 0.76           | <b>0.76</b>         | <b>0.71</b>                    | 0.33                                 | 0.55                        | 0.67                        | 0.44               | 0.67                                               | 0.71                                    | 0.48                                   | 0.40                                               | 0.33                            | -0.57                      | -0.21                              | 0.42             | 0.61             | 0.26                        | 0.17                 |
| Repetition              | 0.51                                   | 0.61             | 0.58            | 0.60           | 0.49                | 0.44                           | <b>0.64</b>                          | <b>0.62</b>                 | <b>0.60</b>                 | <b>0.48</b>        | 0.44                                               | 0.60                                    | 0.34                                   | 0.36                                               | 0.29                            | -0.62                      | -0.02                              | 0.32             | 0.55             | 0.13                        | 0.05                 |
| Change tasks            | -0.35                                  | -0.43            | -0.42           | -0.45          | -0.36               | -0.28                          | -0.45                                | -0.42                       | -0.36                       | -0.32              | -0.31                                              | -0.45                                   | -0.20                                  | -0.21                                              | -0.12                           | 0.49                       | -0.03                              | -0.22            | -0.39            | 0.00                        | 0.09                 |
| Rest eyes               | -0.40                                  | -0.47            | -0.47           | -0.52          | -0.43               | -0.37                          | -0.39                                | -0.39                       | -0.42                       | -0.32              | -0.38                                              | -0.52                                   | -0.21                                  | -0.21                                              | -0.08                           | 0.51                       | 0.11                               | -0.21            | -0.40            | -0.02                       | 0.08                 |
| Kneel or squat          | 0.67                                   | 0.71             | 0.75            | 0.77           | 0.69                | 0.70                           | 0.32                                 | 0.54                        | 0.68                        | 0.44               | <b>0.76</b>                                        | <b>0.74</b>                             | <b>0.57</b>                            | 0.44                                               | 0.37                            | -0.61                      | -0.26                              | 0.41             | 0.61             | 0.36                        | 0.27                 |
| Bend trunk              | 0.67                                   | 0.73             | 0.74            | 0.78           | 0.71                | 0.65                           | 0.45                                 | 0.64                        | 0.72                        | 0.51               | 0.70                                               | <b>0.79</b>                             | <b>0.51</b>                            | 0.40                                               | 0.32                            | -0.66                      | -0.22                              | 0.49             | 0.70             | 0.21                        | 0.11                 |
| Drive machinery         | 0.64                                   | 0.64             | 0.66            | 0.61           | 0.45                | 0.47                           | 0.32                                 | 0.53                        | 0.67                        | 0.53               | 0.56                                               | 0.56                                    | 0.53                                   | <b>0.65</b>                                        | 0.52                            | -0.49                      | -0.14                              | 0.40             | 0.56             | 0.46                        | 0.39                 |
| Drive car or truck      | 0.31                                   | <b>0.26</b>      | <b>0.29</b>     | 0.21           | -0.02               | 0.05                           | -0.08                                | <b>0.08</b>                 | <b>0.18</b>                 | 0.14               | 0.27                                               | 0.17                                    | 0.36                                   | <b>0.46</b>                                        | 0.43                            | -0.15                      | -0.18                              | 0.13             | 0.20             | 0.50                        | 0.43                 |
| Handle objects 1-4 kg   | 0.68                                   | <b>0.72</b>      | <b>0.75</b>     | 0.76           | 0.69                | 0.67                           | 0.39                                 | <b>0.61</b>                 | <b>0.75</b>                 | 0.52               | 0.70                                               | 0.73                                    | 0.58                                   | 0.53                                               | 0.42                            | -0.63                      | -0.21                              | 0.45             | 0.65             | 0.34                        | 0.24                 |
| Handle objects >4 kg    | 0.71                                   | <b>0.75</b>      | <b>0.78</b>     | 0.77           | 0.68                | 0.66                           | 0.40                                 | 0.52                        | <b>0.76</b>                 | 0.52               | 0.71                                               | 0.74                                    | 0.59                                   | 0.55                                               | 0.43                            | -0.64                      | -0.20                              | 0.46             | 0.67             | 0.36                        | 0.26                 |
| Carry loads <10 kg      | 0.71                                   | <b>0.74</b>      | <b>0.77</b>     | 0.76           | 0.67                | 0.65                           | 0.38                                 | 0.61                        | <b>0.75</b>                 | 0.51               | 0.70                                               | 0.72                                    | 0.59                                   | 0.56                                               | 0.44                            | -0.62                      | -0.21                              | 0.46             | 0.66             | 0.38                        | 0.29                 |
| Carry loads 10-25 kg    | 0.72                                   | <b>0.75</b>      | <b>0.79</b>     | <b>0.76</b>    | 0.65                | 0.64                           | 0.38                                 | 0.62                        | <b>0.76</b>                 | 0.53               | 0.70                                               | 0.73                                    | 0.60                                   | 0.57                                               | 0.45                            | -0.62                      | -0.21                              | 0.47             | 0.68             | 0.38                        | 0.29                 |
| Carry loads > 25 kg     | 0.72                                   | <b>0.76</b>      | <b>0.80</b>     | <b>0.77</b>    | 0.65                | 0.64                           | 0.37                                 | 0.62                        | <b>0.76</b>                 | 0.53               | 0.70                                               | 0.73                                    | 0.61                                   | 0.58                                               | 0.45                            | -0.61                      | -0.21                              | 0.49             | 0.70             | 0.37                        | 0.27                 |
| Use vibrating tools     | 0.66                                   | 0.64             | 0.65            | 0.63           | 0.51                | 0.44                           | 0.43                                 | 0.71                        | 0.70                        | 0.64               | 0.57                                               | 0.64                                    | 0.57                                   | 0.59                                               | <b>0.53</b>                     | -0.56                      | -0.12                              | 0.60             | 0.72             | 0.30                        | 0.26                 |
| Use computer screen     | -0.71                                  | -0.76            | -0.74           | -0.78          | -0.63               | -0.58                          | -0.38                                | -0.58                       | -0.67                       | -0.49              | -0.69                                              | -0.75                                   | -0.51                                  | -0.49                                              | -0.39                           | <b>0.76</b>                | 0.33                               | -0.39            | -0.65            | -0.36                       | -0.26                |
| Use keyboard or scanner | -0.72                                  | -0.76            | -0.75           | -0.79          | -0.63               | -0.58                          | -0.38                                | -0.58                       | -0.67                       | -0.49              | -0.68                                              | -0.75                                   | -0.52                                  | -0.51                                              | -0.40                           | <b>0.76</b>                | <b>0.33</b>                        | -0.39            | -0.65            | -0.37                       | -0.27                |
| Bend neck               | 0.22                                   | 0.29             | 0.27            | 0.33           | 0.40                | 0.27                           | 0.48                                 | 0.51                        | 0.37                        | 0.37               | 0.26                                               | 0.42                                    | 0.13                                   | 0.05                                               | 0.03                            | -0.33                      | 0.01                               | 0.34             | 0.42             | -0.20                       | -0.25                |
| Arms above shoulder     | 0.63                                   | 0.69             | 0.70            | 0.74           | 0.68                | 0.62                           | 0.43                                 | 0.63                        | 0.69                        | 0.49               | 0.67                                               | 0.72                                    | 0.52                                   | 0.43                                               | 0.38                            | -0.60                      | -0.18                              | 0.43             | 0.63             | 0.28                        | 0.23                 |
| Reach behind            | 0.28                                   | 0.30             | 0.31            | 0.30           | 0.23                | 0.15                           | 0.23                                 | 0.33                        | 0.32                        | 0.26               | 0.31                                               | <b>0.36</b>                             | <b>0.27</b>                            | 0.21                                               | 0.17                            | -0.29                      | -0.13                              | 0.25             | 0.34             | 0.08                        | 0.03                 |
| Arms abducted           | 0.67                                   | 0.75             | 0.74            | 0.76           | 0.67                | 0.61                           | 0.55                                 | 0.71                        | 0.75                        | 0.58               | 0.66                                               | 0.76                                    | 0.54                                   | 0.45                                               | 0.39                            | -0.68                      | -0.13                              | 0.54             | 0.73             | 0.20                        | 0.13                 |
| Bend elbow              | 0.72                                   | 0.78             | 0.77            | 0.81           | 0.69                | 0.61                           | 0.52                                 | 0.72                        | <b>0.76</b>                 | 0.60               | 0.68                                               | 0.78                                    | 0.55                                   | 0.53                                               | 0.42                            | -0.69                      | -0.19                              | 0.51             | 0.74             | 0.27                        | 0.19                 |
| Rotate forearm          | 0.70                                   | 0.70             | 0.72            | 0.71           | 0.61                | 0.56                           | 0.41                                 | <b>0.69</b>                 | <b>0.73</b>                 | 0.64               | 0.65                                               | 0.70                                    | 0.60                                   | 0.55                                               | 0.47                            | -0.55                      | -0.14                              | 0.63             | 0.74             | 0.30                        | 0.27                 |
| Bend wrist              | 0.73                                   | 0.77             | 0.77            | 0.77           | 0.66                | 0.60                           | 0.51                                 | <b>0.73</b>                 | <b>0.77</b>                 | <b>0.62</b>        | 0.68                                               | 0.76                                    | 0.60                                   | 0.53                                               | 0.44                            | -0.65                      | -0.16                              | 0.59             | 0.76             | 0.28                        | 0.23                 |
| Press base of hand      | 0.67                                   | 0.67             | 0.68            | 0.68           | 0.59                | 0.56                           | 0.44                                 | 0.66                        | 0.72                        | 0.62               | 0.62                                               | 0.66                                    | 0.56                                   | 0.54                                               | 0.47                            | -0.57                      | -0.14                              | 0.52             | 0.66             | 0.32                        | 0.26                 |
| Finger pinch            | 0.58                                   | 0.61             | 0.62            | 0.65           | 0.63                | 0.52                           | 0.43                                 | 0.69                        | 0.69                        | <b>0.60</b>        | 0.56                                               | 0.67                                    | 0.49                                   | 0.39                                               | 0.32                            | -0.52                      | -0.11                              | <b>0.63</b>      | <b>0.71</b>      | 0.11                        | 0.06                 |
| Work outdoors           | 0.55                                   | 0.48             | 0.49            | 0.45           | 0.21                | 0.28                           | -0.02                                | 0.19                        | 0.37                        | 0.21               | 0.46                                               | 0.34                                    | 0.44                                   | 0.60                                               | 0.51                            | -0.35                      | -0.30                              | 0.14             | 0.31             | <b>0.72</b>                 | <b>0.65</b>          |

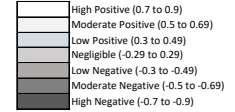

**Supplement Figure 1.** Spearman correlation coefficients between 27 French CONSTANCES JEM and 21 American O\*NET JEM variable pairs (total of 567 variable pairs). Boxes bolded in black indicate exposure variables pairs (n = 50) that were matched *a priori* based on similarities in exposure variable descriptions.

|                                          |                         | American O*NET JEM Exposure Variables  |                  |                 |                |                     |                                |                                      |                             |                             |                    |                                                    |                                         |                                        |                                                    |                                 |                            |                                    |                  |                  |                             |                      |
|------------------------------------------|-------------------------|----------------------------------------|------------------|-----------------|----------------|---------------------|--------------------------------|--------------------------------------|-----------------------------|-----------------------------|--------------------|----------------------------------------------------|-----------------------------------------|----------------------------------------|----------------------------------------------------|---------------------------------|----------------------------|------------------------------------|------------------|------------------|-----------------------------|----------------------|
|                                          |                         | Performing General Physical Activities | Dynamic Strength | Static Strength | Trunk Strength | Spend Time Standing | Spend Time Walking and Running | Spend Time Making Repetitive Motions | Spend Time Using Your Hands | Handling and Moving Objects | Wrist Finger Speed | Spend Time Kneeling Crouching Stopping or Crawling | Spend Time Bending or Twisting the Body | Cramped Work Space & Awkward Positions | Operating Vehicles Mechanized Devices or Equipment | Exposed to Whole Body Vibration | Interacting With Computers | Importance of Repeating Same Tasks | Finger Dexterity | Manual Dexterity | Outdoors Exposed to Weather | Outdoors Under Cover |
| French CONSTANCES JEM Exposure Variables | Physical intensity      | 0.54                                   | 0.60             | 0.60            | 0.62           | 0.51                | 0.50                           | 0.33                                 | 0.52                        | 0.58                        | 0.43               | 0.53                                               | 0.62                                    | 0.49                                   | 0.35                                               | 0.28                            | -0.54                      | -0.15                              | 0.40             | 0.52             | 0.23                        | 0.15                 |
|                                          | Stand                   | 0.45                                   | 0.50             | 0.49            | 0.53           | 0.57                | 0.52                           | 0.27                                 | 0.43                        | 0.50                        | 0.34               | 0.51                                               | 0.55                                    | 0.42                                   | 0.25                                               | 0.17                            | -0.44                      | -0.12                              | 0.32             | 0.42             | 0.16                        | 0.07                 |
|                                          | Repetition              | 0.34                                   | 0.36             | 0.36            | 0.42           | 0.31                | 0.26                           | 0.44                                 | 0.51                        | 0.42                        | 0.32               | 0.24                                               | 0.44                                    | 0.32                                   | 0.23                                               | 0.20                            | -0.47                      | -0.07                              | 0.26             | 0.36             | 0.08                        | 0.04                 |
|                                          | Change tasks            | -0.22                                  | -0.27            | -0.27           | -0.33          | -0.27               | -0.24                          | -0.30                                | -0.33                       | -0.21                       | -0.20              | -0.17                                              | -0.34                                   | -0.16                                  | -0.10                                              | -0.01                           | 0.42                       | 0.09                               | -0.17            | -0.24            | -0.01                       | 0.09                 |
|                                          | Rest eyes               | -0.30                                  | -0.36            | -0.38           | -0.41          | -0.32               | -0.30                          | -0.29                                | -0.36                       | -0.30                       | -0.26              | -0.27                                              | -0.43                                   | -0.24                                  | -0.11                                              | -0.05                           | 0.43                       | 0.16                               | -0.20            | -0.30            | -0.03                       | 0.07                 |
|                                          | Kneel or squat          | 0.46                                   | 0.49             | 0.56            | 0.57           | 0.54                | 0.55                           | 0.24                                 | 0.44                        | 0.52                        | 0.39               | 0.49                                               | 0.55                                    | 0.45                                   | 0.29                                               | 0.22                            | -0.40                      | -0.17                              | 0.33             | 0.44             | 0.24                        | 0.14                 |
|                                          | Bend trunk              | 0.43                                   | 0.51             | 0.52            | 0.56           | 0.52                | 0.52                           | 0.28                                 | 0.51                        | 0.52                        | 0.40               | 0.50                                               | 0.40                                    | 0.44                                   | 0.24                                               | 0.22                            | -0.48                      | -0.15                              | 0.38             | 0.46             | 0.16                        | 0.08                 |
|                                          | Drive machinery         | 0.51                                   | 0.43             | 0.54            | 0.43           | 0.37                | 0.40                           | 0.27                                 | 0.48                        | 0.56                        | 0.42               | 0.37                                               | 0.40                                    | 0.44                                   | 0.56                                               | 0.34                            | -0.40                      | -0.05                              | 0.38             | 0.47             | 0.38                        | 0.25                 |
|                                          | Drive car or truck      | 0.24                                   | 0.22             | 0.23            | 0.13           | -0.02               | 0.04                           | -0.03                                | 0.08                        | 0.18                        | 0.14               | 0.22                                               | 0.13                                    | 0.23                                   | 0.34                                               | 0.34                            | 0.01                       | -0.03                              | 0.16             | 0.22             | 0.34                        | 0.35                 |
|                                          | Handle objects 1-4 kg   | 0.52                                   | 0.56             | 0.60            | 0.61           | 0.53                | 0.53                           | 0.30                                 | 0.50                        | 0.60                        | 0.44               | 0.49                                               | 0.57                                    | 0.47                                   | 0.38                                               | 0.28                            | -0.48                      | -0.14                              | 0.39             | 0.51             | 0.28                        | 0.17                 |
|                                          | Handle objects >4 kg    | 0.50                                   | 0.54             | 0.59            | 0.59           | 0.51                | 0.52                           | 0.28                                 | 0.49                        | 0.58                        | 0.43               | 0.48                                               | 0.55                                    | 0.46                                   | 0.37                                               | 0.26                            | -0.49                      | -0.14                              | 0.38             | 0.50             | 0.26                        | 0.15                 |
|                                          | Carry loads <10 kg      | 0.49                                   | 0.54             | 0.59            | 0.60           | 0.49                | 0.50                           | 0.26                                 | 0.48                        | 0.58                        | 0.43               | 0.46                                               | 0.55                                    | 0.45                                   | 0.39                                               | 0.27                            | -0.49                      | -0.14                              | 0.39             | 0.51             | 0.26                        | 0.16                 |
|                                          | Carry loads 10-25 kg    | 0.52                                   | 0.56             | 0.60            | 0.60           | 0.50                | 0.50                           | 0.27                                 | 0.48                        | 0.61                        | 0.43               | 0.49                                               | 0.56                                    | 0.46                                   | 0.42                                               | 0.30                            | -0.46                      | -0.13                              | 0.39             | 0.51             | 0.28                        | 0.19                 |
|                                          | Carry loads > 25 kg     | 0.52                                   | 0.56             | 0.61            | 0.59           | 0.51                | 0.52                           | 0.28                                 | 0.48                        | 0.61                        | 0.45               | 0.49                                               | 0.57                                    | 0.47                                   | 0.42                                               | 0.31                            | -0.44                      | -0.12                              | 0.40             | 0.52             | 0.29                        | 0.20                 |
|                                          | Use vibrating tools     | 0.51                                   | 0.49             | 0.47            | 0.48           | 0.29                | 0.31                           | 0.27                                 | 0.53                        | 0.53                        | 0.49               | 0.36                                               | 0.43                                    | 0.41                                   | 0.49                                               | 0.41                            | -0.42                      | -0.04                              | 0.47             | 0.61             | 0.21                        | 0.20                 |
|                                          | Use computer screen     | -0.53                                  | -0.59            | -0.58           | -0.58          | -0.41               | -0.43                          | -0.30                                | -0.49                       | -0.53                       | -0.36              | -0.49                                              | -0.59                                   | -0.44                                  | 0.33                                               | -0.32                           | 0.56                       | 0.24                               | -0.34            | -0.46            | -0.24                       | -0.15                |
|                                          | Use keyboard or scanner | -0.55                                  | -0.62            | -0.55           | -0.63          | -0.40               | -0.43                          | -0.25                                | -0.43                       | -0.48                       | -0.35              | -0.48                                              | -0.54                                   | -0.42                                  | -0.36                                              | -0.32                           | 0.51                       | 0.17                               | -0.39            | -0.52            | -0.20                       | -0.17                |
|                                          | Bend neck               | 0.14                                   | 0.21             | 0.19            | 0.23           | 0.32                | 0.22                           | 0.31                                 | 0.35                        | 0.26                        | 0.28               | 0.19                                               | 0.33                                    | 0.11                                   | 0.02                                               | 0.03                            | -0.24                      | -0.09                              | 0.18             | 0.23             | -0.07                       | -0.15                |
|                                          | Arms above shoulder     | 0.43                                   | 0.48             | 0.48            | 0.48           | 0.53                | 0.48                           | 0.29                                 | 0.48                        | 0.50                        | 0.36               | 0.43                                               | 0.49                                    | 0.38                                   | 0.30                                               | 0.22                            | -0.41                      | -0.15                              | 0.34             | 0.42             | 0.21                        | 0.15                 |
|                                          | Reach behind            | 0.15                                   | 0.16             | 0.15            | 0.13           | 0.08                | 0.06                           | 0.07                                 | 0.14                        | 0.16                        | 0.12               | 0.15                                               | 0.18                                    | 0.13                                   | 0.13                                               | 0.07                            | -0.10                      | -0.04                              | 0.13             | 0.16             | 0.02                        | -0.01                |
|                                          | Arms abducted           | 0.49                                   | 0.58             | 0.57            | 0.60           | 0.47                | 0.45                           | 0.33                                 | 0.55                        | 0.54                        | 0.41               | 0.48                                               | 0.61                                    | 0.47                                   | 0.32                                               | 0.26                            | -0.52                      | -0.16                              | 0.41             | 0.51             | 0.18                        | 0.11                 |
|                                          | Bend elbow              | 0.50                                   | 0.55             | 0.58            | 0.60           | 0.48                | 0.47                           | 0.34                                 | 0.60                        | 0.58                        | 0.43               | 0.47                                               | 0.61                                    | 0.48                                   | 0.37                                               | 0.34                            | -0.52                      | -0.13                              | 0.43             | 0.54             | 0.22                        | 0.15                 |
|                                          | Rotate forearm          | 0.50                                   | 0.52             | 0.53            | 0.51           | 0.42                | 0.44                           | 0.30                                 | 0.56                        | 0.55                        | 0.48               | 0.44                                               | 0.50                                    | 0.44                                   | 0.42                                               | 0.31                            | -0.46                      | -0.07                              | 0.45             | 0.58             | 0.22                        | 0.16                 |
|                                          | Bend wrist              | 0.51                                   | 0.55             | 0.56            | 0.58           | 0.47                | 0.46                           | 0.31                                 | 0.58                        | 0.59                        | 0.46               | 0.50                                               | 0.59                                    | 0.50                                   | 0.39                                               | 0.32                            | -0.46                      | -0.09                              | 0.45             | 0.58             | 0.21                        | 0.15                 |
|                                          | Press base of hand      | 0.52                                   | 0.47             | 0.53            | 0.47           | 0.40                | 0.43                           | 0.29                                 | 0.52                        | 0.56                        | 0.46               | 0.44                                               | 0.46                                    | 0.46                                   | 0.42                                               | 0.32                            | -0.48                      | -0.09                              | 0.38             | 0.50             | 0.26                        | 0.16                 |
|                                          | Finger pinch            | 0.41                                   | 0.44             | 0.44            | 0.45           | 0.48                | 0.43                           | 0.26                                 | 0.54                        | 0.50                        | 0.47               | 0.43                                               | 0.51                                    | 0.37                                   | 0.31                                               | 0.24                            | -0.36                      | -0.05                              | 0.44             | 0.55             | 0.12                        | 0.06                 |
|                                          | Work outdoors           | 0.42                                   | 0.35             | 0.38            | 0.31           | 0.07                | 0.19                           | -0.02                                | 0.18                        | 0.30                        | 0.14               | 0.31                                               | 0.20                                    | 0.33                                   | 0.43                                               | 0.36                            | -0.17                      | -0.08                              | 0.18             | 0.29             | 0.49                        | 0.47                 |

Substantial (0.61 to 0.80)  
 Moderate (0.41 to 0.60)  
 Fair (0.21 to 0.40)  
 None to Slight (< 0.20)

**Supplement Figure 2.** Cohen's Kappa values between 27 French CONSTANCES JEM and 21 American O\*NET JEM variable pairs (total of 567 variable pairs). Boxes bolded in black indicate exposure variables pairs (n = 50) that were matched *a priori* based on similarities in exposure variable descriptions. Kappa value indicates agreement between high and low exposure groups of variable pair.
